# Supplementary material
Source: PubMed Central journal article supplement (PMC2810088)
Supplement: JCI40706sd.pdf [file JCI40706sd.pdf]

## **Supplemental Information**

### **Tobacco-specific Carcinogen Induces DNA Methyltransferases 1 Accumulation through AKT/GSK3 $\beta$ / $\beta$ TrCP/hnRNP-U in Mice and Lung Cancer patients**

Ruo-Kai Lin,<sup>1</sup> Yi-Shuan Hsieh,<sup>2</sup> Pinpin Lin,<sup>3</sup> Han-Shui Hsu,<sup>4</sup> Chih-Yi Chen,<sup>5</sup> Yen-An  
Tang<sup>1</sup>, Chung-Fan Lee,<sup>6</sup> and Yi-Ching Wang<sup>1,\*</sup>

## Supplemental figures and legends

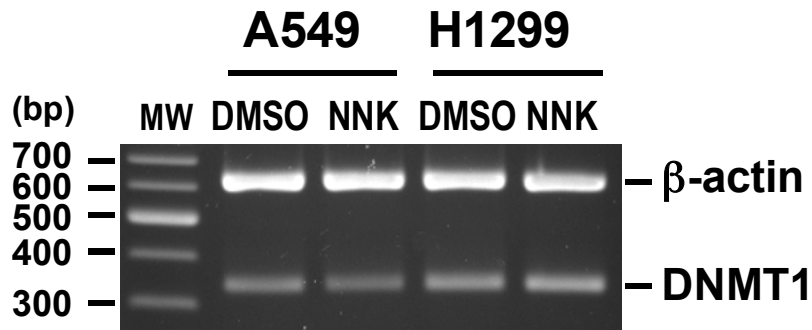

**Supplemental Figure 1 NNK-treated A549 and H1299 cells showed no change in the endogenous *DNMTs* mRNA expression levels.**  
The expression level was measured by RT-PCR. The housekeeping gene *β-actin* was used as an internal control.

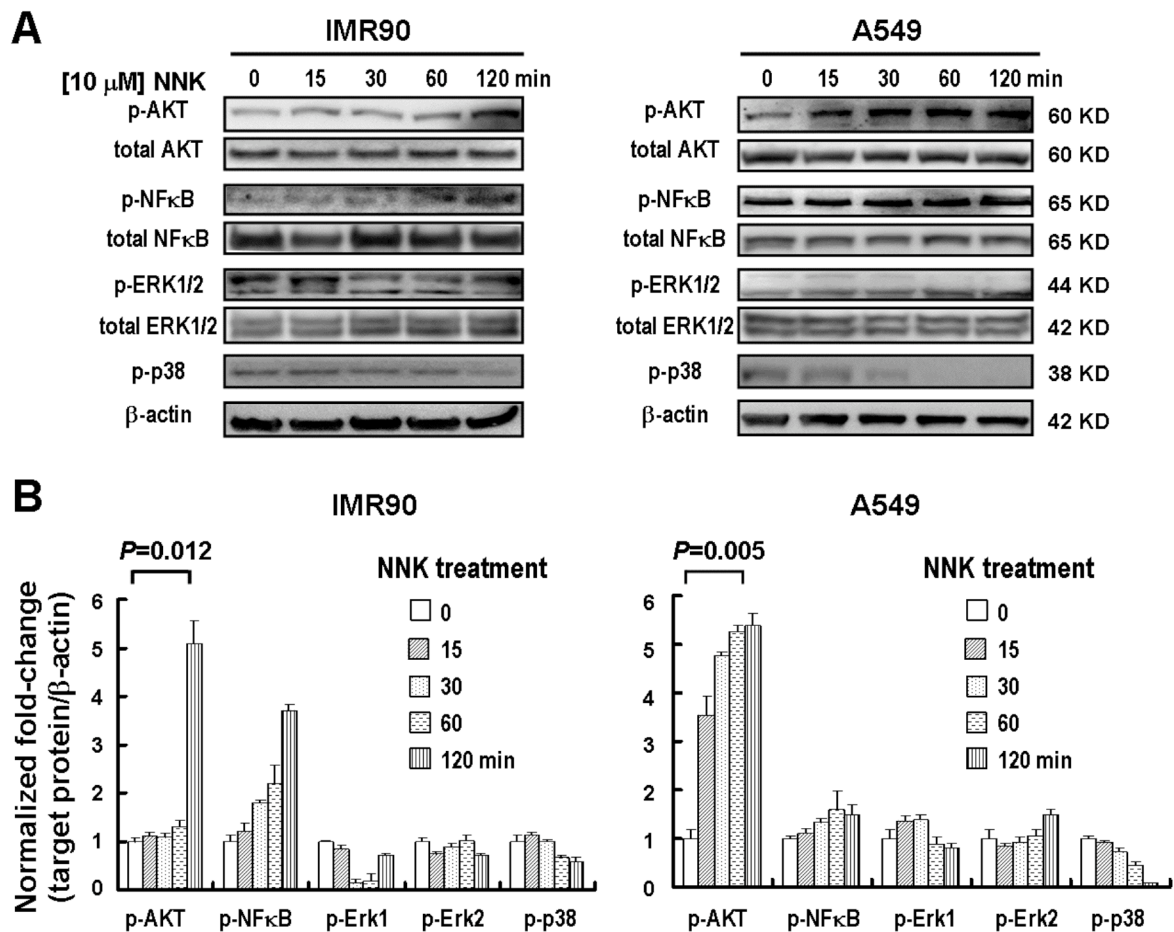

**Supplemental Figure 2 The signaling pathways induced by NNK.**

(A) IMR90 normal lung cell line and A549 lung cancer cell lines were treated with 10  $\mu$ M NNK for various times as indicated. Phosphorylation of AKT was analyzed by Western blotting using phospho-AKT at Ser473 antibody. Total AKT antibody was used to confirm and quantify AKT protein. Western blot analysis was performed to detect phosphorylated NF $\kappa$ B or total NF $\kappa$ B by using a phospho-specific NF $\kappa$ B or total NF $\kappa$ B antibodies; phosphorylated ERK1/2 or total ERK1/2 by using a phospho-specific ERK1/2 or a mixture of ERK1 and ERK2 antibodies. Phosphorylation of p38 was analyzed by Western blotting using phospho-p38 antibody.  $\beta$ -actin used an internal control.

(B) Quantitative figures were determined from at least three experiments. Columns, mean; bars,  $\pm$ SEM. and  $P$  values are as indicated.

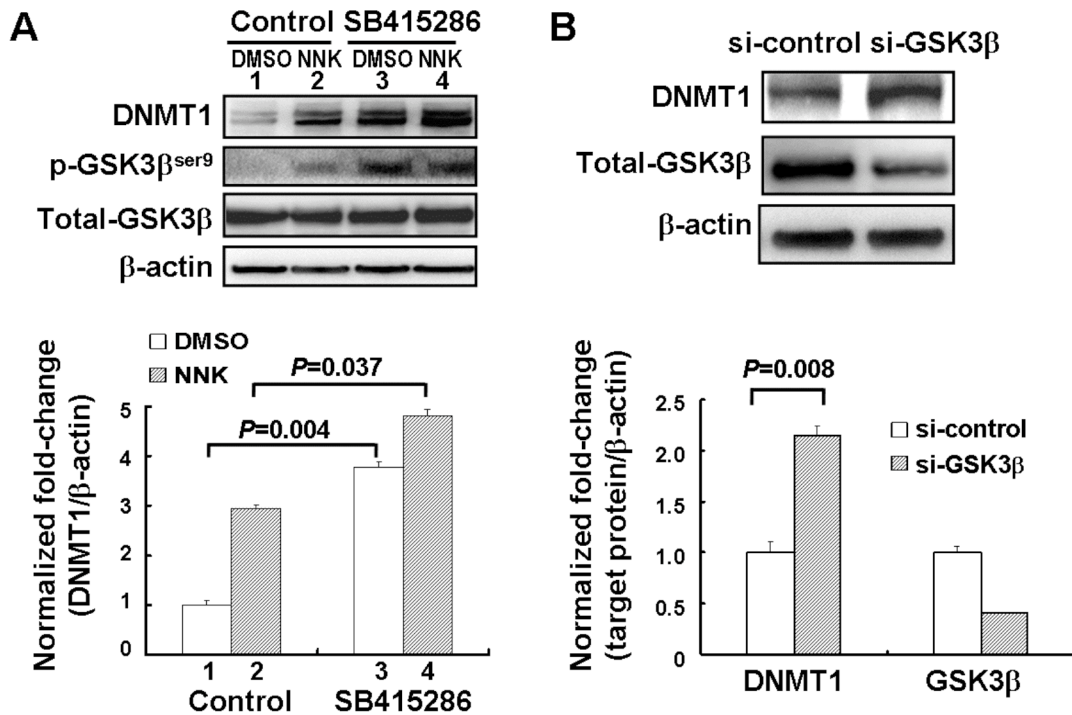

**Supplemental Figure 3 GSK3 $\beta$  involved in DNMT1 protein degradation and the increase of DNMT1 protein level by NNK in IMR90 cells.**

(A) IMR90 cells were treated with or without 25  $\mu$ M GSK3 $\beta$  inhibitor, SB415286 for 24 hr, and then treated with 10  $\mu$ M NNK for 2 hr. Increased in DNMT1 protein expression after inhibition of GSK3 $\beta$  activity by NNK and SB415286 was observed (lanes 2-4 versus lane 1 in DNMT1 level). Phosphorylated GSK3 $\beta^{ser9}$  (inactive form can be seen after NNK and SB415286 treatment (lanes 2-4 versus lane 1 in GSK3 $\beta^{ser9}$  level). Protein expression levels of DNMT1, phosphorylation of GSK3 $\beta^{ser9}$ , and total GSK3 $\beta$  were analyzed by Western blotting with  $\beta$ -actin as an internal control. Densitometry showing the change of DNMT1 protein level. (B) Knockdown of GSK3 $\beta$  in cells treated by siRNA enhanced DNMT1 protein level. Columns, mean; bars,  $\pm$ SEM (n=3). *P* values are as indicated.

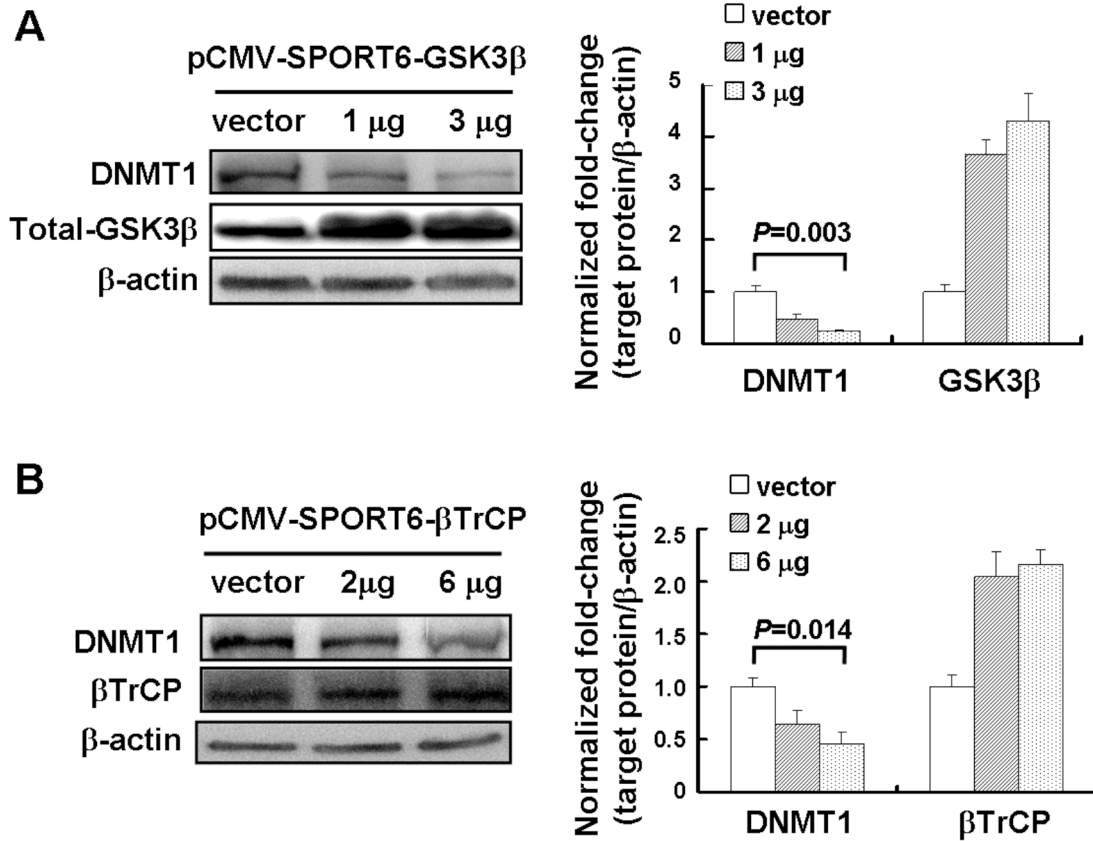

**Supplemental Figure 4 Exogenous GSK3 $\beta$  and  $\beta$ TrCP induced DNMT1 protein degradation.**

(A) GSK3 $\beta$  and (B)  $\beta$ TrCP promoted DNMT1 protein degradation in a dose-dependent manner as seen using both Western blot and densitometry assays. A549 cells were transfected with pCMV-SPORT6-GSK3 $\beta$  or pCMV-SPORT6- $\beta$ TrCP at indicated doses for 24 h. Columns, mean; bars,  $\pm$ SEM (n=3). *P* values are as indicated.

**DNMT1 (green) and  
p-GSK3 $\beta$ <sup>Ser9</sup> (red)**

**Control**

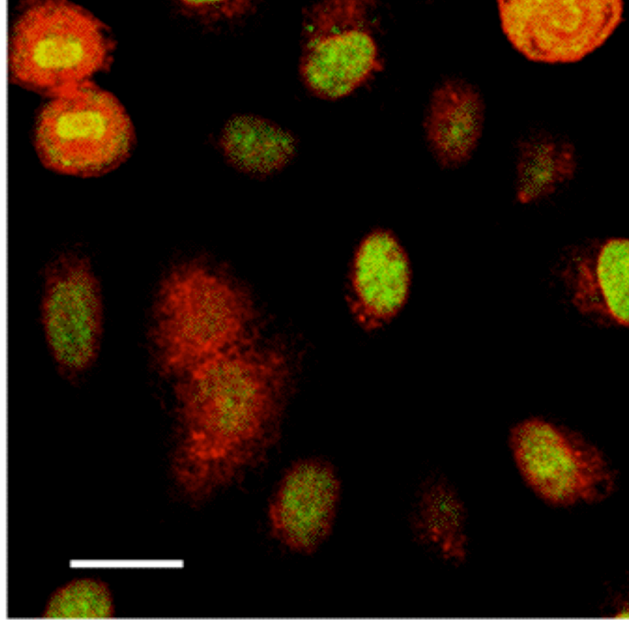

**NNK**

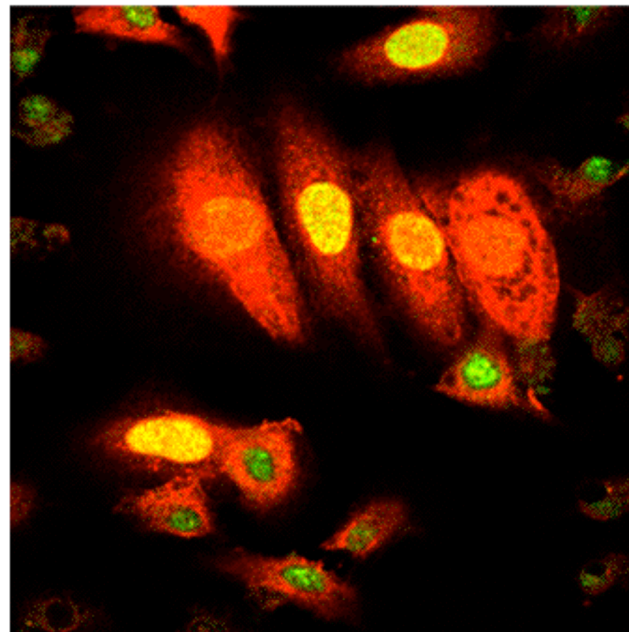

**Supplemental Figure 5 An increase of DNMT1 and p-GSK3 $\beta$ <sup>Ser9</sup> expression and their co-localization (yellow color) were observed in cells treated with NNK.**

Immunofluorescence staining of DNMT1 (green color) and p-GSK3 $\beta$ <sup>Ser9</sup> (red color) was performed and visualized by confocal microscopy. Scale bar: 40  $\mu$ m.

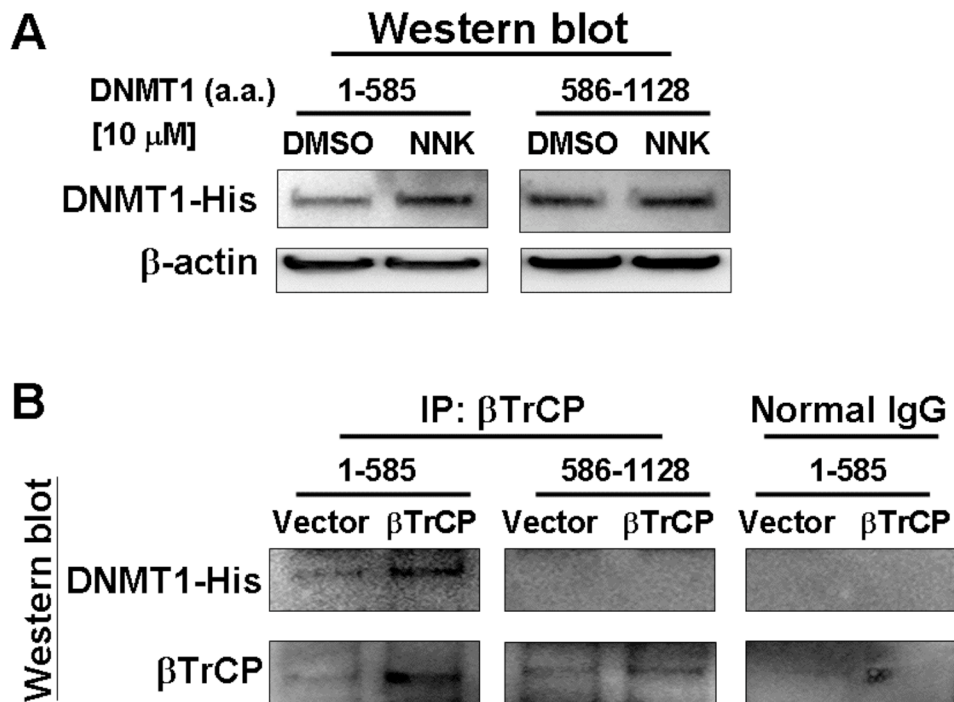

**Supplemental Figure 6 The N-terminal domain of DNMT1 could be induced by NNK treatment which was important for  $\beta$ TrCP interaction.**

(A) Analysis of two cDNA deletion constructs of His-tag DNMT1 expression vector, which contained either amino acids 1-585 or 585-1128 of DNMT1, are shown. The N-terminal domain of 1-585 amino acids could be induced by NNK treatment. (B) Immunoprecipitation assay was performed in A549 cells transfected with control vector or pCMV-SPORT6- $\beta$ TrCP with various regions for 24 hr. Cell lysates were immunoprecipitated with anti- $\beta$ TrCP antibody and Western blotted with anti-His-DNMT1 antibody. Normal-IgG is a negative control. Data demonstrated that N-terminal domain of 1-585 amino acids of DNMT1 was important for  $\beta$ TrCP interaction.

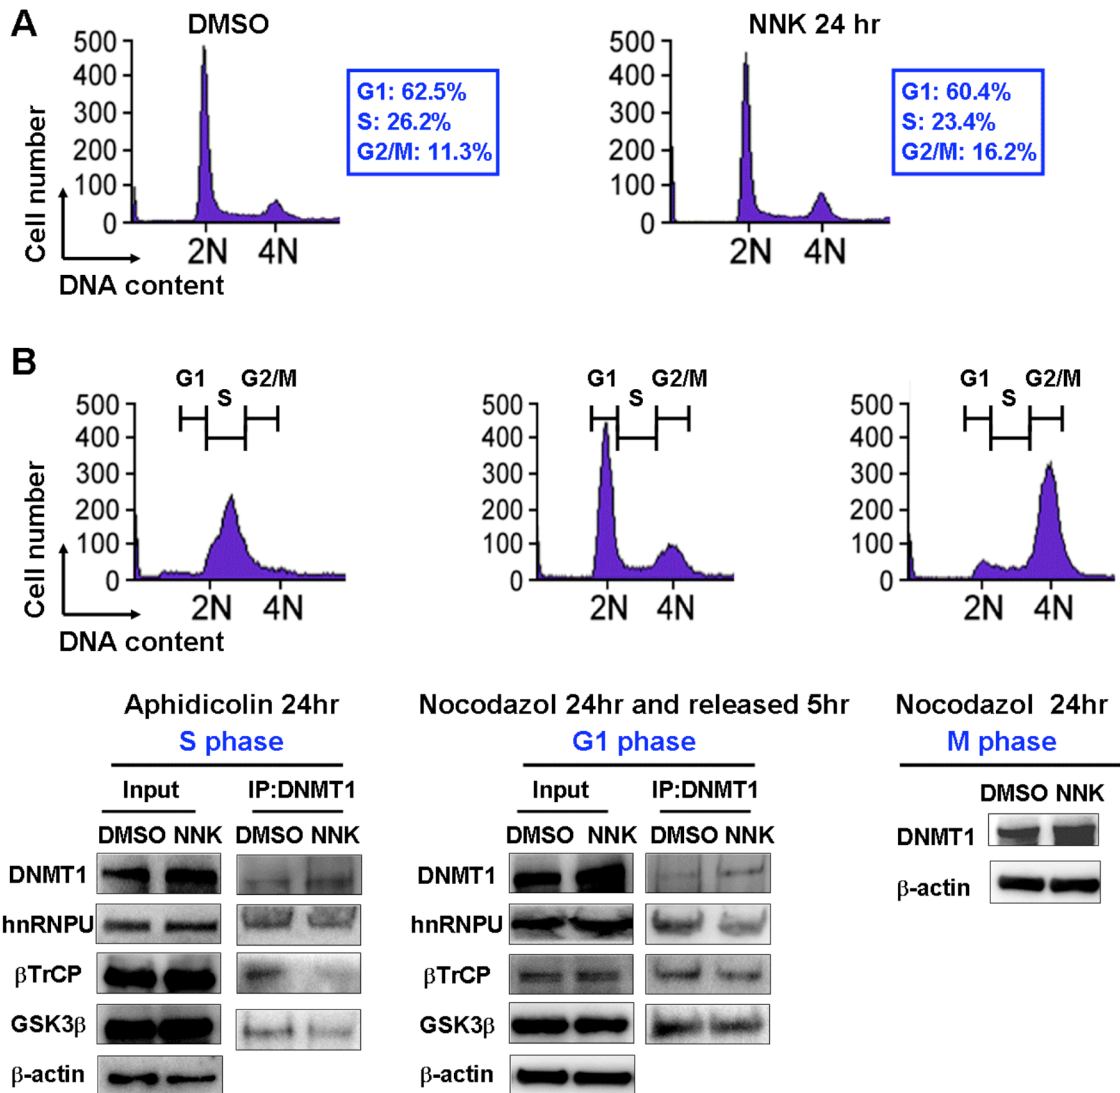

**Supplemental Figure 7 NNK-induced DNMT1 accumulation by AKT/GSK3 $\beta$ / $\beta$ TrCP/hnRNP-U signaling pathway was not due to the impact of NNK treatment on the cell cycle.**

(A) Flow cytometry showed that 10 $\mu$ M of NNK treatment for 24 hours did not change cell cycle distribution in A549 cells (upper panel). (B) Flow cytometry was performed in A549 cells treated with aphidocolin, nocodazole, and 5 hour post-release from nocodazole to confirm the induction of S, G2/M, and G1 phases, respectively. Western or Immunoprecipitation assay (lower panel) of cell treated with 10  $\mu$ M NNK at specific cell cycle phases to show the induction of DNMT1 protein level and the interaction between DNMT1 and hnRNPU,  $\beta$ TrCP, and GSK3 $\beta$ . Data demonstrated that NNK-induced DNMT1 accumulation could be seen in all phases of cell cycle.



## Supplemental Tables

**Supplemental Table 1** Multivariate Analysis of factors associated with poor survival<sup>A</sup>.

| Variable             | Risk Ratio | 95%CI               | <i>P</i> |
|----------------------|------------|---------------------|----------|
| Age                  | 0.965949   | (0.629407-1.425018) | 0.8660   |
| Tumor type           | 1.000318   | (0.709554-1.391339) | 0.9985   |
| Tumor stage          | 1.085139   | (0.767648-1.541339) | 0.6432   |
| Smoking and DNMT1(+) | 1.524797   | (1.099739-2.143316) | 0.0114   |

<sup>A</sup>: Results were analyzed by the Cox proportional hazards regression modal.

**Supplemental Table 2** The mRNA expression of DNMT1 was not associated with the smoking status of patients <sup>A</sup>

| Characteristics                | DNMT1 mRNA |                    |                            |
|--------------------------------|------------|--------------------|----------------------------|
|                                | Total      | Non-overexpression | Overexpression             |
|                                | N          | N (%)              | N (%)                      |
| <b>Overall</b>                 | 85         | 48 (51.1)          | 37 (48.9)                  |
| <b>Smoking habit</b>           |            |                    |                            |
| <b>Smoker</b>                  | 44         | 25 (58.6)          | 19 (43.2) <sup>0.947</sup> |
| <b>Non-smoker</b> <sup>B</sup> | 41         | 23 (56.1)          | 18 (43.9)                  |

<sup>A</sup>. Results were analyzed by the Pearson Chi-Square test. Degree of freedom = 1. *P* value with significance is shown as superscript.

<sup>B</sup>. The non-smoker group includes ex-smoker and never smoker.

**Supplemental Table 3.** Overexpression of DNMTs proteins and clinical parameters in NSCLC tumors.<sup>A</sup>

| Characteristics                       | Total <sup>B</sup><br>n | DNMT1                    |                            |
|---------------------------------------|-------------------------|--------------------------|----------------------------|
|                                       |                         | High expression<br>n (%) | Normal expression<br>n (%) |
| Overall                               | 124                     | 60 (48.4)                | 64 (51.6)                  |
| <u>Clinicopathological parameters</u> |                         |                          |                            |
| Age < 65                              | 35                      | 19 (54.3)                | 16 (45.7)                  |
| ≥ 65                                  | 89                      | 41 (46.1)                | 48 (53.9)                  |
| Tumor type                            |                         |                          |                            |
| SQ                                    | 48                      | 24 (50.0)                | 24 (50.0)                  |
| AD                                    | 67                      | 33 (49.3)                | 34 (50.7)                  |
| Tumor stage                           |                         |                          |                            |
| I + II                                | 60                      | 28 (46.7)                | 32 (53.3)                  |
| III + IV                              | 64                      | 32 (50.0)                | 32 (50.0)                  |

<sup>A</sup>. Results were analyzed by the Pearson Chi-Square test. Degree of freedom = 1. *P* value with significance is shown as superscript.

<sup>B</sup>. Total number of samples (n) in some categories is less than the overall number analyzed because clinical data was not available for some samples.

**Supplemental Table 4** The antibodies and their reaction conditions used in the present study

| Target                                       | K.D.  | Raised In | Application          | Dilution | Source               | Catalog No.   |
|----------------------------------------------|-------|-----------|----------------------|----------|----------------------|---------------|
| Anti-DNMT1                                   | 190   | Chicken   | Western blot         | 1:10000  | Asia Hepato Gene Co. | A22659        |
|                                              |       |           | Immunoprecipitation  | 1:100    |                      |               |
|                                              |       |           | Immunohistochemistry | 1:500    |                      |               |
|                                              |       |           | Immunofluorescence   |          |                      |               |
|                                              |       | Mouse     | Immunohistochemistry | 1:30     | Imgenex              | IMG261A       |
| Anti- $\alpha$ -actin                        | 42    | Mouse     | Western blot         | 1:5000   | Novus Biologicals    | NB 600-501    |
| Anti-LAMIN A/C                               | 62/69 | Mouse     | Western blot         | 1:2000   | Santa Cruz           | sc-7292       |
| Anti-GAPDH                                   | 38    | Mouse     | Western blot         | 1:2000   | Santa Cruz           | Sc-32233      |
| Anti-AKT                                     | 60    | Rabbit    | Western blot         | 1:1000   | Cell Signaling       | 9272          |
|                                              |       |           | Immunoprecipitation  | 1:100    |                      |               |
| Anti-phospho-AKT <sup>Ser473</sup>           | 60    | Rabbit    | Western blot         | 1:500    | Cell Signaling       | 9271          |
|                                              |       |           | Immunohistochemistry | 1:30     |                      | 3787          |
| Anti-Erk1/2                                  | 42,44 | Rabbit    | Western blot         | 1:1000   | Upstate              | 06-182        |
| Anti-phospho-Erk1/2                          | 42/44 | Mouse     | Western blot         | 1:1000   | Upstate              | 05-481        |
| Anti-phospho-p38 <sup>Thr180</sup>           | 38    | Rabbit    | Western blot         | 1:1000   | Chemicon             | AB3828        |
| Anti-NF $\kappa$ B                           | 65    | Rabbit    | Western blot         | 1:1000   | Upstate              | 06-418        |
| Anti-phospho-NF $\kappa$ B <sup>Ser536</sup> | 65    | Rabbit    | Western blot         | 1:1000   | Cell Signaling       | 3031          |
| Anti-GSK3 $\beta$                            | 46    | Rabbit    | Western blot         | 1:5000   | Cell Signaling       | 9315          |
|                                              |       |           | Immunoprecipitation  | 1:125    |                      |               |
| Anti-phospho-GSK3 $\beta$ <sup>Ser9</sup>    | 46    | Rabbit    | Western blot         | 1:1000   | Nuvus                | NB100 - 81948 |
|                                              |       |           | Immunohistochemistry | 1:100    |                      |               |
|                                              |       |           | Immunofluorescence   | 1:100    |                      |               |
| Anti- $\beta$ TrCP                           | 70    | Mouse     | Western blot         | 1:500    | Zymed                | 37-3400       |
|                                              |       | Goat      | Immunohistochemistry | 1:300    | Santa Cruz           | sc-8862       |
|                                              |       |           | Immunofluorescence   |          |                      |               |
|                                              |       |           | Immunoprecipitation  | 1:25     |                      |               |
| Anti-p53                                     | 53    | Mouse     | Western blot         | 1:1000   | DAKO                 | DO-7          |

|                     |                 |        |                      |        |                |          |
|---------------------|-----------------|--------|----------------------|--------|----------------|----------|
| Anti-His            | -- <sup>A</sup> | Rabbit | Western blotting     | 1:500  | Cell Signaling | 2365     |
|                     |                 |        | Immunoprecipitation  | 1:50   |                |          |
| Anti-phospho-serine | -- <sup>A</sup> | Mouse  | Western blotting     | 1:500  | Sigma          | P3430    |
|                     |                 |        | Immunoprecipitation  | 1:50   |                |          |
| Anti-hnRNP-U        | 130             | Mouse  | Western blotting     | 1:2000 | Santa Cruz     | sc-32315 |
|                     |                 |        | Immunofluorescence   | 1:50   |                |          |
|                     |                 |        | Immunoprecipitation  |        |                |          |
| Anti-hnRNP-U        | 130             | Rabbit | Immunofluorescence   | 1:50   | Santa Cruz     | sc-25374 |
|                     |                 |        | Immunohistochemistry |        |                |          |
| Anti-ubiquitin      | -- <sup>A</sup> | Mouse  | Western blotting     | 1:1000 | Santa Cruz     | sc-8017  |
|                     |                 |        | Immunoprecipitation  | 1:50   |                |          |

<sup>A</sup> . -- Molecular weight is variable .
